# Supplementary material
Source: Springer Nature journal article supplement (https://www.springermedizin.de/resource/supplementary/12916_2006_91_MOESM3_ESM.pdf/9599156)
Supplement: MOESM3 [file 9599156]

negative control

control

black tea 4%

black tea 0.4%

black tea 0.04%

black tea 0.004%

black tea 0.0004%

4%

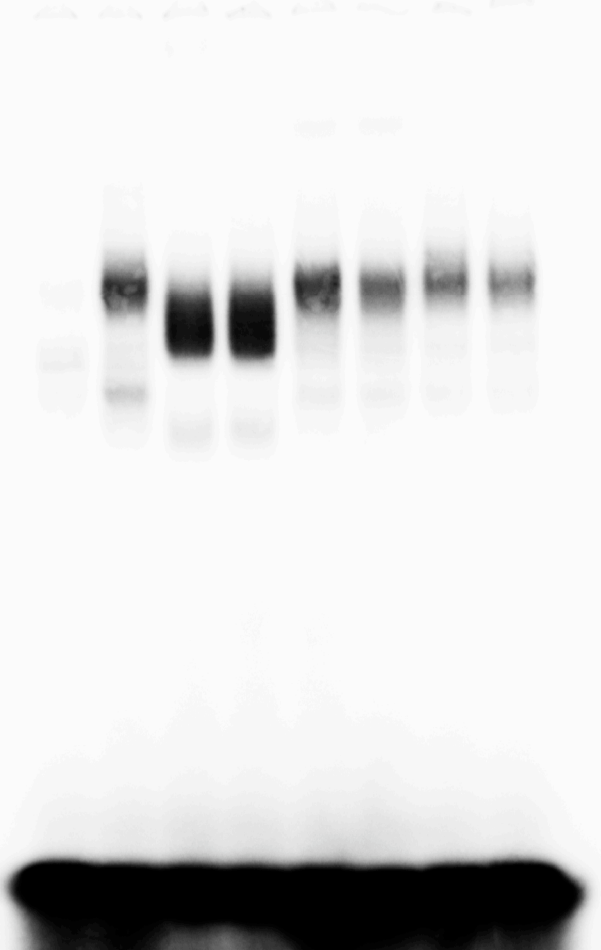

← NF-κB

← n.s.

← free oligonucleotide
